# Supplementary material for: Facile alkali-assisted synthesis of g-C3N4 materials and their high-performance catalytic application in solvent-free cycloaddition of CO2 to epoxides
Source: Royal Society of Chemistry journal article supplement (doi:10.1039/c6ra10509b), 2016-01-01
Supplement: c6ra10509b1.pdf [file c6ra10509b1.pdf]

## Supporting Information for

### Facile Alkali-assisted Synthesis of g-C<sub>3</sub>N<sub>4</sub> Materials and Their High-performance Catalytic Application in Solvent-free Cycloaddition of CO<sub>2</sub> to Epoxides

Jie Xu \*, Jie-Kun Shang, Quan Jiang, Yue Wang, Yong-Xin Li \*

*Jiangsu Key Laboratory of Advanced Catalytic Materials and Technology, School of Petrochemical Engineering, Changzhou University, Gehu Road 1, Changzhou, Jiangsu 213164, PR China*

**Table S1** Product mass of g-C<sub>3</sub>N<sub>4</sub> samples prepared by 9 g of GndCl.

| Sample   | g-C <sub>3</sub> N <sub>4</sub> -T-direct |     |     |     |     | g-C <sub>3</sub> N <sub>4</sub> -T-NaOH |     |     |     |     |
|----------|-------------------------------------------|-----|-----|-----|-----|-----------------------------------------|-----|-----|-----|-----|
|          | 400                                       | 425 | 450 | 475 | 500 | 400                                     | 425 | 450 | 475 | 500 |
| Mass (g) | 4.0                                       | 3.1 | 2.7 | 2.6 | 2.4 | 3.1                                     | 2.9 | 2.7 | 2.4 | 2.0 |

**Table S2** Textural parameters of g-C<sub>3</sub>N<sub>4</sub> materials.

| Sample                                      | $S_{\text{BET}}$ (m <sup>2</sup> g <sup>-1</sup> ) | $D_{\text{pore}}$ (nm) | $V_{\text{pore}}$ (cm <sup>3</sup> g <sup>-1</sup> ) |
|---------------------------------------------|----------------------------------------------------|------------------------|------------------------------------------------------|
| g-C <sub>3</sub> N <sub>4</sub> -450-direct | 3                                                  | 2.38                   | 0.018                                                |
| g-C <sub>3</sub> N <sub>4</sub> -475-direct | 11                                                 | 2.83                   | 0.041                                                |
| g-C <sub>3</sub> N <sub>4</sub> -450-NaOH   | 11                                                 | 2.63                   | 0.037                                                |
| g-C <sub>3</sub> N <sub>4</sub> -475-NaOH   | 16                                                 | 2.44                   | 0.064                                                |

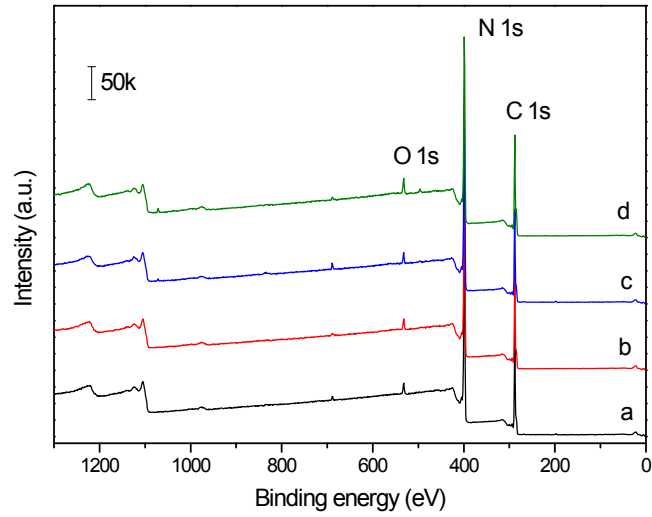

**Fig. S1** XPS survey of g-C<sub>3</sub>N<sub>4</sub>-450-direct (a), g-C<sub>3</sub>N<sub>4</sub>-475-direct (b), g-C<sub>3</sub>N<sub>4</sub>-450-NaOH (c), and g-C<sub>3</sub>N<sub>4</sub>-475-NaOH (d) materials.

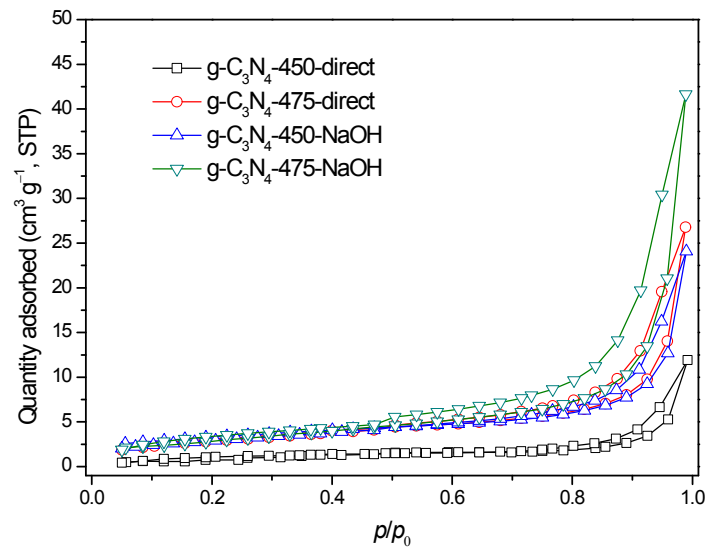

**Fig. S2** N<sub>2</sub> adsorption–desorption isotherms of g-C<sub>3</sub>N<sub>4</sub> samples.

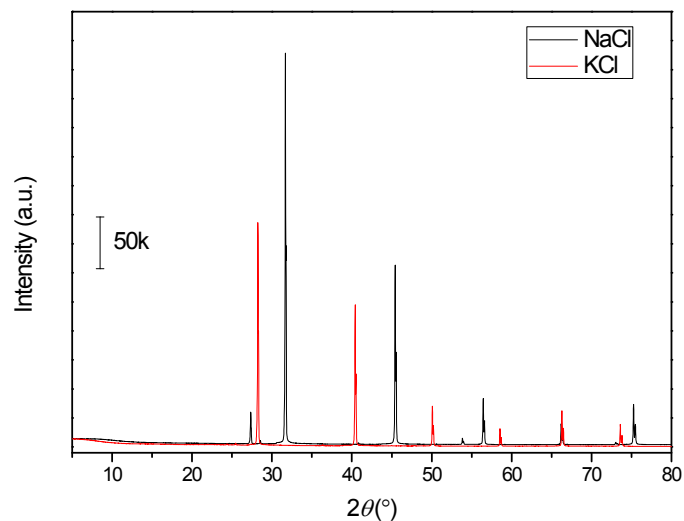

**Fig. S3** XRD pattern of white precipitation resulted from mixing  $\text{GndCl}$  with  $\text{NaOH}$ (black line) or  $\text{KOH}$  (red line) in ethanol solution.

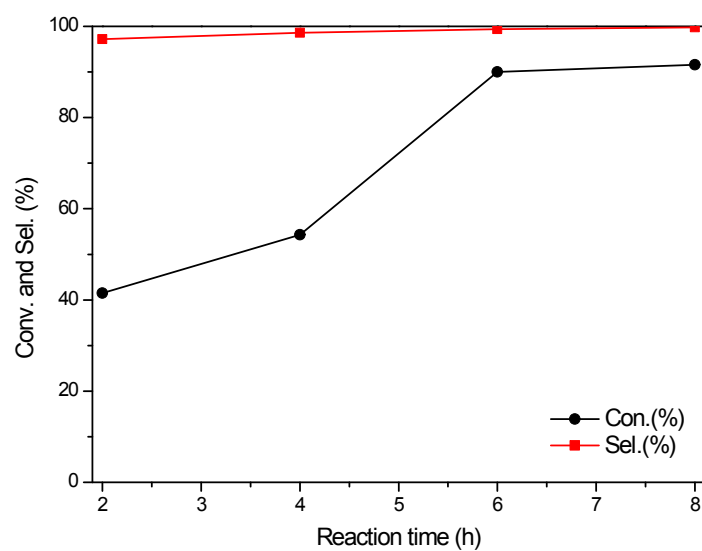

**Fig. S4** Evolution of the catalytic activity of  $\text{g-C}_3\text{N}_4\text{-475-NaOH}$  during 8 h of reaction time. Reaction conditions:  $V_{\text{PO}} = 10 \text{ mL}$ ,  $p_{\text{CO}_2} = 2.0 \text{ MPa}$ ,  $T = 140 \text{ }^\circ\text{C}$ ,  $W_{\text{catal.}} = 0.4 \text{ g}$  and 38 mg of  $\text{ZnI}_2$  added.

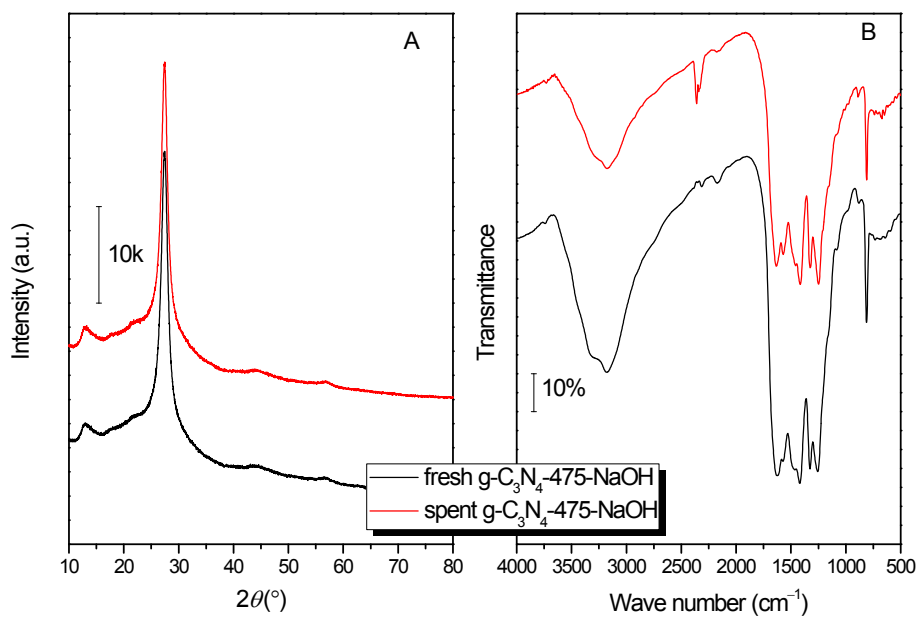

**Fig. S5** XRD patterns (A) and FT-IR spectra (B) of the fresh and spent  $\text{g-C}_3\text{N}_4\text{-475-NaOH}$  catalysts subjected to five catalytic runs.

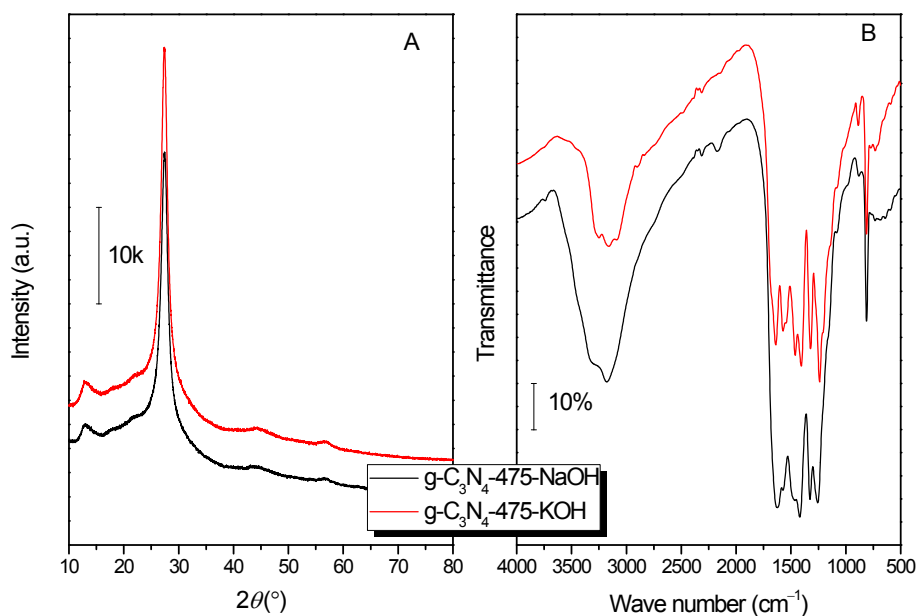

**Fig. S6** XRD patterns (A) and FT-IR spectra (B) of  $\text{g-C}_3\text{N}_4\text{-475-NaOH}$  and  $\text{g-C}_3\text{N}_4\text{-475-KOH}$ .
